# Supplementary material for: Virological assessment of hospitalized patients with COVID-2019
Source: Springer Nature journal article supplement (doi:10.1038/s41586-020-2196-x), 2020-04-01
Supplement: 41586_2020_2196_MOESM2_ESM.pdf [file 41586_2020_2196_MOESM2_ESM.pdf]

## Reporting Summary

Nature Research wishes to improve the reproducibility of the work that we publish. This form provides structure for consistency and transparency in reporting. For further information on Nature Research policies, see [Authors & Referees](#) and the [Editorial Policy Checklist](#).

### Statistics

For all statistical analyses, confirm that the following items are present in the figure legend, table legend, main text, or Methods section.

n/a Confirmed

- The exact sample size ( $n$ ) for each experimental group/condition, given as a discrete number and unit of measurement
- A statement on whether measurements were taken from distinct samples or whether the same sample was measured repeatedly
- The statistical test(s) used AND whether they are one- or two-sided  
*Only common tests should be described solely by name; describe more complex techniques in the Methods section.*
- A description of all covariates tested
- A description of any assumptions or corrections, such as tests of normality and adjustment for multiple comparisons
- A full description of the statistical parameters including central tendency (e.g. means) or other basic estimates (e.g. regression coefficient) AND variation (e.g. standard deviation) or associated estimates of uncertainty (e.g. confidence intervals)
- For null hypothesis testing, the test statistic (e.g.  $F$ ,  $t$ ,  $r$ ) with confidence intervals, effect sizes, degrees of freedom and  $P$  value noted  
*Give  $P$  values as exact values whenever suitable.*
- For Bayesian analysis, information on the choice of priors and Markov chain Monte Carlo settings
- For hierarchical and complex designs, identification of the appropriate level for tests and full reporting of outcomes
- Estimates of effect sizes (e.g. Cohen's  $d$ , Pearson's  $r$ ), indicating how they were calculated

*Our web collection on [statistics for biologists](#) contains articles on many of the points above.*

### Software and code

Policy information about [availability of computer code](#)

Data collection

Microsoft Excel,

Data analysis

SPSS, GraphPad Prism, Geneious

For manuscripts utilizing custom algorithms or software that are central to the research but not yet described in published literature, software must be made available to editors/reviewers. We strongly encourage code deposition in a community repository (e.g. GitHub). See the Nature Research [guidelines for submitting code & software](#) for further information.

### Data

Policy information about [availability of data](#)

All manuscripts must include a [data availability statement](#). This statement should provide the following information, where applicable:

- Accession codes, unique identifiers, or web links for publicly available datasets
- A list of figures that have associated raw data
- A description of any restrictions on data availability

The data upon which figures and conclusions are based can be obtained from the corresponding author upon reasonable request. These data cannot be published in an open source because their interpretation may affect aspects of patient privacy.

### Field-specific reporting

Please select the one below that is the best fit for your research. If you are not sure, read the appropriate sections before making your selection.

- Life sciences       Behavioural & social sciences       Ecological, evolutionary & environmental sciences

## Life sciences study design

All studies must disclose on these points even when the disclosure is negative.

|                 |                                        |
|-----------------|----------------------------------------|
| Sample size     | Nine Patients.                         |
| Data exclusions | None.                                  |
| Replication     | Testing by two different laboratories. |
| Randomization   | None.                                  |
| Blinding        | None.                                  |

## Reporting for specific materials, systems and methods

We require information from authors about some types of materials, experimental systems and methods used in many studies. Here, indicate whether each material, system or method listed is relevant to your study. If you are not sure if a list item applies to your research, read the appropriate section before selecting a response.

### Materials & experimental systems

| n/a                                 | Involvement in the study                                        |
|-------------------------------------|-----------------------------------------------------------------|
| <input type="checkbox"/>            | <input checked="" type="checkbox"/> Antibodies                  |
| <input type="checkbox"/>            | <input checked="" type="checkbox"/> Eukaryotic cell lines       |
| <input checked="" type="checkbox"/> | <input type="checkbox"/> Palaeontology                          |
| <input checked="" type="checkbox"/> | <input type="checkbox"/> Animals and other organisms            |
| <input type="checkbox"/>            | <input checked="" type="checkbox"/> Human research participants |
| <input type="checkbox"/>            | <input checked="" type="checkbox"/> Clinical data               |

### Methods

| n/a                                 | Involvement in the study                        |
|-------------------------------------|-------------------------------------------------|
| <input checked="" type="checkbox"/> | <input type="checkbox"/> ChIP-seq               |
| <input checked="" type="checkbox"/> | <input type="checkbox"/> Flow cytometry         |
| <input checked="" type="checkbox"/> | <input type="checkbox"/> MRI-based neuroimaging |

## Antibodies

|                 |                                                |
|-----------------|------------------------------------------------|
| Antibodies used | Secondary anti-human IgG reagents (Euroimmun). |
| Validation      | Immunofluorescence.                            |

## Eukaryotic cell lines

Policy information about [cell lines](#)

|                                                                      |                                                     |
|----------------------------------------------------------------------|-----------------------------------------------------|
| Cell line source(s)                                                  | In-house collection with reference to ATCC or DSZM. |
| Authentication                                                       | Functional testing for IFN locus inactivation.      |
| Mycoplasma contamination                                             | Regular testing.                                    |
| Commonly misidentified lines<br>(See <a href="#">ICLAC</a> register) | N/A                                                 |

## Human research participants

Policy information about [studies involving human research participants](#)

|                            |                                                                                                                                                       |
|----------------------------|-------------------------------------------------------------------------------------------------------------------------------------------------------|
| Population characteristics | N.A.                                                                                                                                                  |
| Recruitment                | Clinical admission due to symptoms, contact history, and positive initial test.                                                                       |
| Ethics oversight           | Research ethics board of Ludwig Maximilians University Munich; informed consent to scientific use and publication of anonymized data by each patient. |

Note that full information on the approval of the study protocol must also be provided in the manuscript.

## Clinical data

---

Policy information about [clinical studies](#)

All manuscripts should comply with the ICMJE [guidelines for publication of clinical research](#) and a completed [CONSORT checklist](#) must be included with all submissions.

|                             |                                                                                                |
|-----------------------------|------------------------------------------------------------------------------------------------|
| Clinical trial registration | N.A.                                                                                           |
| Study protocol              | No study protocol emergency admissions of patients with new disease.                           |
| Data collection             | Data collection at treating hospital, and two laboratories as identified in affiliations list. |
| Outcomes                    | Laboratory and clinical status. No explicit outcome measure.                                   |
